# Supplementary material for: Crystal structure prediction and property calculation of copper–oxygen compounds using innovative search software from first principles
Source: Royal Society of Chemistry journal article supplement (doi:10.1039/d4cp02501f), 2024-01-01
Supplement: d4cp02501f2.pdf [file d4cp02501f2.pdf]

# Crystal structure prediction and properties calculation of copper-oxygen compounds by an innovative search software from first principles

Jinrong Huo<sup>a,b</sup>, Kai Zhang<sup>a,b</sup>, Pengfei Liu<sup>a,b</sup>, Haocong Wei<sup>a,b</sup>, Chaozheng He<sup>b\*</sup>

<sup>a</sup> School of Sciences, Xi'an Technological University, Xi'an, Shaanxi 710021, China

<sup>b</sup> Institute of Environmental and Energy Catalysis, School of Materials Science and Chemical Engineering, Xi'an Technological University, Xi'an, Shaanxi 710021, China

<sup>c</sup> Key Laboratory of Automobile Materials, Ministry of Education, Department of Materials Science and Engineering, Jilin University, China

## 1. Supporting Information:

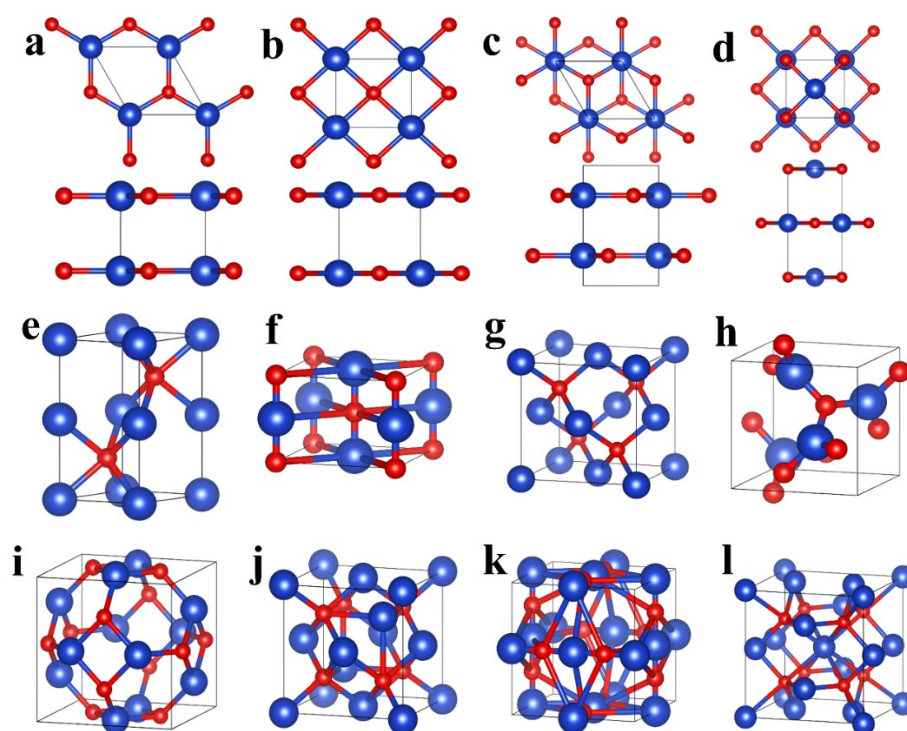

Figure. S 1 Crystal structure diagram of 12 predicted structures of  $Cu_xO_y$  ( $x=y=1-10$ ).  
Table. S 1 Crystallographic information for 12 predicted structures of  $Cu_xO_y$  ( $x=y=1-10$ ).

| Structure Name | Constituent atom | Crystal system | Space group | Coordination number of copper | Coordination number of oxygen | a= b/ Å | a= b/ Å | c/ Å |
|----------------|------------------|----------------|-------------|-------------------------------|-------------------------------|---------|---------|------|
| 4303           | 2                | Tetragonal     | P-6M2(187)  | 3                             | 3                             | 3.29    | 3.29    | 2.52 |

|      |    |            |                  |   |   |      |      |      |
|------|----|------------|------------------|---|---|------|------|------|
|      |    |            |                  |   |   | 9    | 9    | 0    |
| 4103 | 2  | Tetragonal | P4-MMM(123)      | 4 | 4 | 2.82 | 2.82 | 2.98 |
|      |    |            |                  |   |   | 8    | 8    | 5    |
| 4739 | 4  | Tetragonal | P63/MMC(194<br>) | 3 | 3 | 3.37 | 3.37 | 4.68 |
|      |    |            |                  |   |   | 1    | 1    | 8    |
| 4834 | 4  | Tetragonal | I4/MMM(139)      | 4 | 4 | 2.87 | 2.87 | 5.86 |
|      |    |            |                  |   |   | 1    | 1    | 3    |
| 2316 | 4  | Tetragonal | P63/MMC(194<br>) | 6 | 6 | 2.46 | 2.46 | 4.88 |
|      |    |            |                  |   |   | 2    | 2    | 7    |
| 5594 | 4  | Tetragonal | I4/MMM(139)      | 6 | 6 | 3.44 | 3.44 | 2.49 |
|      |    |            |                  |   |   | 3    | 3    | 1    |
| 4603 | 8  | Cubic      | F-43M(216)       | 4 | 4 | 4.44 | 4.44 | 4.44 |
|      |    |            |                  |   |   | 6    | 6    | 6    |
| 1026 | 8  | Cubic      | P4332(212)       | 3 | 3 | 3.62 | 3.62 | 3.62 |
|      |    |            |                  |   |   | 5    | 5    | 5    |
| 5310 | 12 | Cubic      | PM-3N(223)       | 3 | 3 | 5.27 | 5.27 | 5.27 |
|      |    |            |                  |   |   | 5    | 5    | 5    |
| 4841 | 12 | Cubic      | PN-3M(224)       | 3 | 5 | 4.34 | 4.34 | 4.34 |
|      |    |            |                  |   |   | 0    | 0    | 0    |
| 4345 | 12 | Cubic      | PM-3N(223)       | 6 | 6 | 4.36 | 4.36 | 4.36 |
|      |    |            |                  |   |   | 0    | 0    | 0    |
| 962  | 16 | Cubic      | PM-3N(223)       | 8 | 5 | 5.65 | 5.65 | 5.65 |
|      |    |            |                  |   |   | 6    | 6    | 6    |

Continuation table:

| Structure | $\alpha=\beta$ | $\gamma$ | Volume/<br>$\text{\AA}^3$ | Cu-O bond<br>length/ $\text{\AA}$ | Cu-Cu bond<br>length/ $\text{\AA}$ | O-O bond<br>length/ $\text{\AA}$ | Cu-O-Cu 键<br>角 |
|-----------|----------------|----------|---------------------------|-----------------------------------|------------------------------------|----------------------------------|----------------|
| 4303      | 90             | 120      | 23.762                    | 1.905                             | 3.299                              | 3.299                            | 120            |
| 4103      | 90             | 90       | 23.872                    | 1.999                             | 2.828                              | 2.828                            | 90             |
| 4739      | 90             | 120      | 46.130                    | 1.946                             | 3.371                              | 3.371                            | 120            |
| 4834      | 90             | 90       | 48.338                    | 2.030                             | 2.871                              | 2.871                            | 90             |
| 2316      | 90             | 120      | 25.668                    | 1.875                             | 2.444                              | 2.828                            | 82.098         |
| 5594      | 90             | 90       | 29.525                    | 2.434                             | 2.735                              | 2.735                            | 90             |

|      |    |    |         |       |       |       |         |
|------|----|----|---------|-------|-------|-------|---------|
| 4603 | 90 | 90 | 87.902  | 1.925 | 3.144 | 3.144 | 109.471 |
| 1026 | 90 | 90 | 47.647  | 1.282 | 2.220 | 2.220 | 120     |
| 5310 | 90 | 90 | 146.817 | 1.865 | 2.638 | 2.638 | 120     |
| 4841 | 90 | 90 | 81.725  | 1.879 | 3.069 | 2.170 | 109.471 |
| 4345 | 90 | 90 | 82.908  | 2.437 | 2.180 | 2.670 | 126.870 |
| 962  | 90 | 90 | 180.971 | 2.449 | 3.162 | 2.828 | 90      |

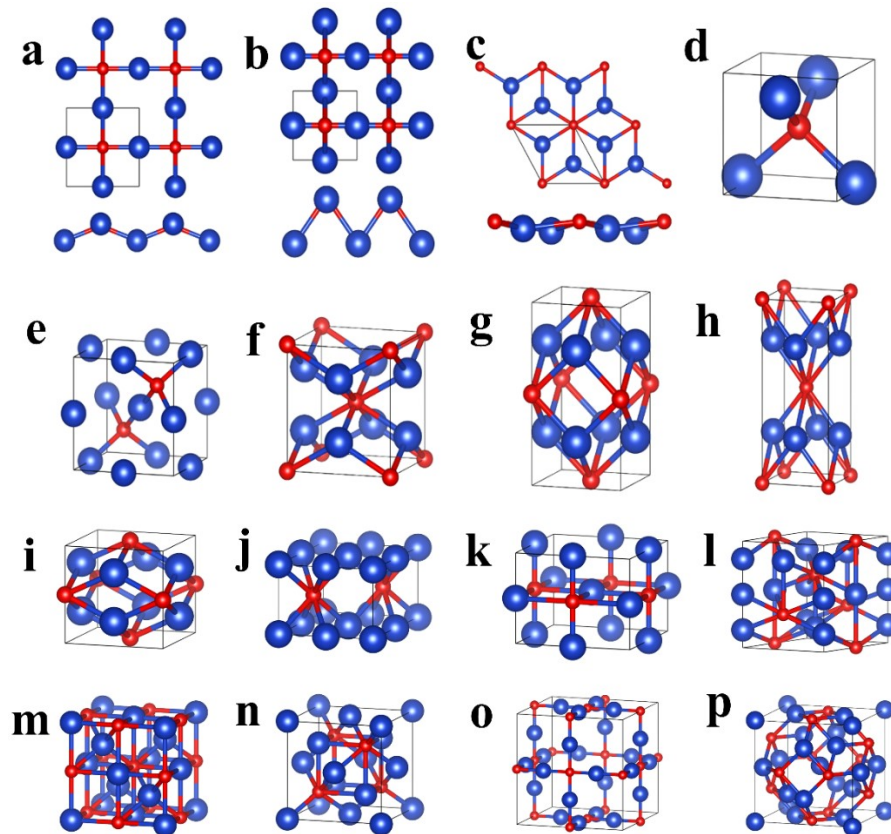

Figure. S 2 Crystal structure diagram of 16 predicted structures of  $\text{Cu}_2\text{xOx}$  ( $\text{x}=1-6$ ).

Table. S 2 Crystallographic information for 16 predicted structures of  $\text{Cu}_2\text{xOx}$  ( $\text{x}=1-6$ ).

| Structure Name | Constituent atom | Crystal system | Space group | Coordination       |                    | $a/\text{\AA}$ | $b/\text{\AA}$ | $c/\text{\AA}$ |
|----------------|------------------|----------------|-------------|--------------------|--------------------|----------------|----------------|----------------|
|                |                  |                |             | n number of copper | n number of oxygen |                |                |                |
| 3831           | 3                | Tetragonal     | PMM2(25)    | 2                  | 4                  | 3.47           | 3.47           | 5.78           |
|                |                  |                |             |                    |                    | 4              | 4              | 5              |
| 3848           | 3                | Tetragonal     | PMM2(25)    | 2                  | 4                  | 2.55           | 2.55           | 8.56           |
|                |                  |                |             |                    |                    | 8              | 8              | 2              |
| 5046           | 3                | Tetragonal     | P3M1(156)   | 3                  | 6                  | 3.90           | 3.90           | 3.41           |
|                |                  |                |             |                    |                    | 6              | 6              | 9              |

|      |    |                  |                 |   |    |           |           |           |
|------|----|------------------|-----------------|---|----|-----------|-----------|-----------|
| 4739 | 3  | Tetragonal       | PMM2(25)        | 4 | 8  | 2.96<br>6 | 2.96<br>6 | 2.81<br>6 |
| 560  | 6  | Cubic            | PN-3M(224)      | 2 | 4  | 4.26<br>3 | 4.26<br>3 | 4.26<br>3 |
| 2574 | 6  | Tetragonal       | I4/MMM(139<br>) | 4 | 8  | 3.86<br>2 | 3.86<br>2 | 4.21<br>9 |
| 2447 | 6  | Tetragonal       | I4/MMM(139<br>) | 4 | 8  | 3.11<br>6 | 3.11<br>6 | 5.70<br>6 |
| 2457 | 6  | Tetragonal       | I4/MMM(139<br>) | 4 | 8  | 2.91<br>1 | 2.91<br>1 | 7.18<br>5 |
| 2603 | 6  | Tetragonal       | I4/MMM(139<br>) | 4 | 8  | 3.59<br>9 | 3.59<br>9 | 3.44<br>2 |
| 2695 | 6  | Orthorhombi<br>c | CMMM(65)        | 4 | 8  | 5.23<br>2 | 3.67<br>2 | 2.60<br>6 |
| 2733 | 6  | Tetragonal       | P4/MMM(12<br>3) | 4 | 8  | 4.55<br>2 | 4.55<br>2 | 3.47<br>2 |
| 3814 | 9  | Tetragonal       | P6422(181)      | 4 | 8  | 3.75<br>8 | 3.75<br>8 | 4.74<br>2 |
| 497  | 12 | Cubic            | F-43M(216)      | 6 | 12 | 4.28<br>8 | 4.28<br>8 | 4.28<br>8 |
| 1975 | 12 | Cubic            | F-43M(216)      | 3 | 6  | 4.36<br>3 | 4.36<br>3 | 4.36<br>3 |
| 781  | 18 | Cubic            | IM-3M(229)      | 2 | 4  | 7.13<br>3 | 7.13<br>3 | 7.13<br>3 |
| 2441 | 18 | Cubic            | P4232(208)      | 4 | 6  | 5.67<br>4 | 5.67<br>4 | 5.67<br>4 |

Continuation table:

| Structure | $\alpha=\beta$ | $\gamma$ | Volume/<br>$\text{\AA}^3$ | Cu-O bond<br>length/ $\text{\AA}$ | Cu-Cu bond<br>length/ $\text{\AA}$ | O-O bond<br>length/ $\text{\AA}$ | Cu-O-Cu 键<br>角 |
|-----------|----------------|----------|---------------------------|-----------------------------------|------------------------------------|----------------------------------|----------------|
| 3831      | 90             | 90       | 69.799                    | 1.739                             | 2.565                              | 3.474                            | 139.140        |
| 3848      | 90             | 90       | 56.045                    | 2.159                             | 2.441                              | 2.558                            | 72.643         |
| 5046      | 90             | 120      | 45.175                    | 2.282                             | 2.257                              | 3.906                            | 59.445         |
| 4739      | 90             | 90       | 24.775                    | 2.185                             | 2.966                              | 2.966                            | 85.515         |

|      |    |     |         |       |       |       |         |
|------|----|-----|---------|-------|-------|-------|---------|
| 560  | 90 | 90  | 77.448  | 1.846 | 3.014 | 3.691 | 109.471 |
| 2574 | 90 | 90  | 62.940  | 2.200 | 2.731 | 3.451 | 76.716  |
| 2447 | 90 | 90  | 55.389  | 2.112 | 2.203 | 3.116 | 84.968  |
| 2457 | 90 | 90  | 60.899  | 2.312 | 2.059 | 2.911 | 52.874  |
| 2603 | 90 | 90  | 44.585  | 1.995 | 1.721 | 3.072 | 51.108  |
| 2695 | 90 | 90  | 50.055  | 2.062 | 1.836 | 3.196 | 78.383  |
| 2733 | 90 | 90  | 71.956  | 1.736 | 3.219 | 3.219 | 90      |
| 3814 | 90 | 120 | 57.984  | 2.038 | 1.879 | 2.455 | 134.373 |
| 497  | 90 | 90  | 78.856  | 2.144 | 3.032 | 3.032 | 90      |
| 1975 | 90 | 90  | 83.034  | 1.889 | 3.085 | 3.085 | 109.471 |
| 781  | 90 | 90  | 362.948 | 1.783 | 2.522 | 3.567 | 90      |
| 2441 | 90 | 90  | 182.650 | 2.006 | 2.837 | 2.837 | 120     |

The elastic constants of these stable copper oxide structures are calculated as follows:

S. 3 Elastic tensor for T-CuO in the unit of GPa:

|         |         |         |        |        |        |
|---------|---------|---------|--------|--------|--------|
| 153.182 | 107.264 | 118.177 | -0.000 | -0.000 | 0.000  |
| 107.264 | 181.455 | 133.689 | -0.001 | -0.000 | 0.000  |
| 118.177 | 133.689 | 139.149 | -0.000 | -0.000 | 0.000  |
| -0.000  | -0.001  | -0.000  | 36.536 | 0.000  | -0.000 |
| -0.000  | -0.000  | -0.000  | 0.000  | 30.935 | -0.000 |
| 0.000   | 0.000   | 0.000   | -0.000 | -0.000 | 6.751  |

S. 4 Elastic tensor for C1-CuO in the unit of GPa:

|         |         |         |        |        |        |
|---------|---------|---------|--------|--------|--------|
| 181.926 | 163.401 | 163.405 | -0.021 | -0.014 | 0.004  |
| 163.401 | 181.936 | 163.412 | -0.021 | -0.012 | 0.002  |
| 163.405 | 163.412 | 181.949 | -0.024 | -0.012 | 0.004  |
| -0.021  | -0.021  | -0.024  | 46.713 | -0.003 | -0.003 |
| -0.014  | -0.012  | -0.012  | -0.003 | 46.709 | 0.000  |
| 0.004   | 0.002   | 0.004   | -0.003 | 0.000  | 46.723 |

S. 5 Elastic tensor for C2-CuO in the unit of GPa:

|         |         |         |        |        |        |
|---------|---------|---------|--------|--------|--------|
| 207.480 | 87.564  | 87.450  | -0.035 | -0.032 | -0.026 |
| 87.564  | 207.900 | 87.572  | -0.020 | -0.035 | -0.039 |
| 87.450  | 87.572  | 207.494 | -0.032 | -0.020 | -0.042 |
| -0.035  | -0.020  | -0.032  | 44.014 | -0.001 | -0.002 |
| -0.032  | -0.035  | -0.020  | -0.001 | 44.014 | 0.000  |

-0.026      -0.039      -0.042      -0.002      0.000      44.016

S. 6 Elastic tensor for C3-CuO in the unit of GPa:

|         |         |         |        |        |        |
|---------|---------|---------|--------|--------|--------|
| 295.178 | 126.634 | 126.634 | 0.000  | 0.000  | 0.000  |
| 126.634 | 295.178 | 126.634 | 0.000  | 0.000  | 0.000  |
| 126.634 | 126.634 | 295.178 | 0.000  | 0.000  | 0.000  |
| 0.000   | 0.000   | 0.000   | 68.259 | 0.000  | 0.000  |
| 0.000   | 0.000   | 0.000   | 0.000  | 68.259 | 0.000  |
| 0.000   | 0.000   | 0.000   | 0.000  | 0.000  | 68.259 |

S. 7 Elastic tensor for D1-Cu<sub>2</sub>O in the unit of GPa:

|         |         |         |        |        |        |
|---------|---------|---------|--------|--------|--------|
| 162.326 | 125.582 | 124.626 | 10.568 | -3.140 | -0.859 |
| 125.582 | 165.635 | 126.554 | 10.241 | -3.243 | -0.877 |
| 124.626 | 126.554 | 166.186 | 10.162 | -3.213 | -0.880 |
| 10.568  | 10.241  | 10.162  | 16.770 | -0.004 | 0.055  |
| -3.140  | -3.243  | -3.213  | -0.004 | 16.870 | -0.100 |
| -0.859  | -0.877  | -0.880  | 0.055  | -0.100 | 16.635 |

S. 8 Elastic tensor for D2-Cu<sub>2</sub>O in the unit of GPa:

|        |        |        |        |        |        |
|--------|--------|--------|--------|--------|--------|
| 50.553 | 36.833 | 40.967 | 0.934  | 0.497  | -1.431 |
| 36.833 | 42.802 | 35.462 | 0.505  | 0.831  | -1.410 |
| 40.967 | 35.462 | 53.475 | 0.711  | 0.647  | -1.472 |
| 0.934  | 0.505  | 0.711  | 5.038  | -0.199 | -0.036 |
| 0.497  | 0.831  | 0.647  | -0.199 | 5.294  | -0.004 |
| -1.431 | -1.410 | -1.472 | -0.036 | -0.004 | 6.266  |
